# Supplementary material for: The Effects of Negative Pressure by External Tissue Expansion Device on Epithelial Cell Proliferation, Neo-Vascularization and Hair Growth in a Porcine Model
Source: PubMed Central journal article supplement (PMC4851423; doi:10.1371/journal.pone.0154328), 2016-04-29
Supplement: pone.0154328.s001.pdf [file pone.0154328.s001.pdf]

Epithelial thickness ( $\mu\text{m}$ )

Fig 3

|   | Control | 1h-10 | 1h-20 | 3h-10 | 3h-20 |
|---|---------|-------|-------|-------|-------|
| 1 | 45.06   | 46.42 | 72.93 | 74.59 | 86.14 |
|   | 38.51   | 37.76 | 47.16 | 57.42 | 92.35 |
| 2 | 39.26   | 52.39 | 48.17 | 62.61 | 64.26 |
|   | 43.49   | 55.23 | 65.8  | 64.4  | 81.92 |
| 3 | 47.82   | 59.47 | 56.94 | 71.65 | 67    |
|   | 38.75   | 37.47 | 63.18 | 90.11 | 83.83 |
| 4 | 37.12   | 48.37 | 53.26 | 74.48 | 64.73 |
|   | 40.22   | 36.64 | 61.17 | 72.45 | 76.86 |
| 5 | 43.17   | 61    | 72.55 | 67.42 | 70.23 |
|   | 41.73   | 53.86 | 59.14 | 61.04 | 68.07 |

| Average |        |        |        |         |                                        |
|---------|--------|--------|--------|---------|----------------------------------------|
| Control | 1h-10  | 1h-20  | 3h-10  | 3h-20   | Epithelial thickness ( $\mu\text{m}$ ) |
| 41.785  | 42.09  | 60.045 | 66.005 | 89.245  |                                        |
| 41.375  | 53.81  | 56.985 | 63.505 | 73.09   | SE                                     |
| 43.285  | 48.47  | 60.06  | 80.88  | 75.415  | P-value                                |
| 38.67   | 42.505 | 57.215 | 73.465 | 70.795  |                                        |
| 42.45   | 57.43  | 65.845 | 64.23  | 69.15   |                                        |
| 45.855  | 62.03  | 70.675 | 89.475 | 95.1    |                                        |
| 41.87   | 60.35  | 71.93  | 89.645 | 105.735 |                                        |
| 42.17   | 54.92  | 80.25  | 80.275 | 95.71   |                                        |
| 42.055  | 64.59  | 85.515 | 90.035 | 101.27  |                                        |
| 47.875  | 66.085 | 69.53  | 100.81 | 91.855  |                                        |
| 58.11   | 77.42  | 83.275 | 88.6   | 117.005 |                                        |
| 60.045  | 84.46  | 76.275 | 90.565 | 91.54   |                                        |
| 62.085  | 73.2   | 73.225 | 104.45 | 93.96   |                                        |
| 60.73   | 74.885 | 76.86  | 88.93  | 91.68   |                                        |
| 62.04   | 78.185 | 73.62  | 97.785 | 90.42   |                                        |

| 3 pig average |       |        |        |        |                                        |
|---------------|-------|--------|--------|--------|----------------------------------------|
| Control       | 1h-10 | 1h-20  | 3h-10  | 3h-20  | Epithelial thickness ( $\mu\text{m}$ ) |
| 48.7          | 62.7  | 70.8   | 84.6   | 90.1   |                                        |
| 2.31          | 3.39  | 2.37   | 3.34   | 3.44   |                                        |
|               | 0.002 | 0.0001 | 0.0001 | 0.0001 |                                        |

HSD[.05]=11.94; HSD[.01]=14.44  
 M1 vs M2 P<.05  
 M1 vs M3 P<.01  
 M1 vs M4 P<.01  
 M1 vs M5 P<.01  
 M2 vs M3 nonsignificant  
 M2 vs M4 P<.01  
 M2 vs M5 P<.01  
 M3 vs M4 P<.05  
 M3 vs M5 P<.01  
 M4 vs M5 nonsignificant

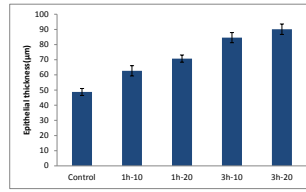

Fig 4

|   |       |       |       |        |        |
|---|-------|-------|-------|--------|--------|
| 1 | 56.02 | 71.72 | 68.6  | 87.45  | 94.42  |
|   | 35.69 | 52.34 | 72.75 | 91.5   | 95.78  |
| 2 | 50.86 | 66.56 | 69.81 | 92.57  | 97.73  |
|   | 32.88 | 54.14 | 74.05 | 86.72  | 113.74 |
| 3 | 40.78 | 52.98 | 92.43 | 80.75  | 93.74  |
|   | 43.56 | 56.86 | 68.07 | 79.8   | 97.68  |
| 4 | 37.49 | 70.71 | 95.98 | 88.51  | 99.1   |
|   | 47.82 | 58.47 | 75.05 | 91.56  | 103.44 |
| 5 | 45.71 | 69.17 | 67.71 | 101.2  | 92.19  |
|   | 50.04 | 63    | 71.35 | 100.42 | 91.52  |

Fig 5

|   |       |       |       |        |        |
|---|-------|-------|-------|--------|--------|
| 1 | 58.47 | 67.51 | 77.89 | 92.87  | 127.05 |
|   | 57.75 | 87.33 | 88.66 | 84.33  | 106.96 |
| 2 | 62.9  | 94.41 | 68.33 | 101.18 | 96.81  |
|   | 57.19 | 74.51 | 84.22 | 79.95  | 86.27  |
| 3 | 63    | 72.85 | 82.51 | 107.59 | 98.12  |
|   | 61.17 | 73.55 | 63.94 | 101.31 | 89.8   |
| 4 | 63.83 | 71.2  | 69.39 | 97.68  | 86.94  |
|   | 57.63 | 78.57 | 84.33 | 80.18  | 96.42  |
| 5 | 67.26 | 77.57 | 70.24 | 95.52  | 88.44  |
|   | 56.82 | 79    | 77    | 100.05 | 92.4   |

| PIG#3              | contorl | 1hr-10times | 1hr-20times | 3hr-10times | 3hr-20times |
|--------------------|---------|-------------|-------------|-------------|-------------|
| in 1.4mm2          | 31      | 70          | 92          | 107         | 115.6       |
|                    | 22.1    | 50          | 65.7        | 76.4        | 82.57       |
| pig#3 ki 67 number | 46      | 52          | 75          | 120         | 125         |
|                    | 23      | 82          | 105         | 91          | 101         |
|                    | 24      | 76          | 96          | 110         | 121         |
| pig#4              | 43      | 45          | 103         | 121         | 99          |
|                    | 33      | 62          | 100         | 120         | 98          |
|                    | 48      | 101         | 99          | 133         | 88          |
|                    | 27      | 111         | 67          | 117         | 100         |
|                    | 34      | 82          | 71          | 80          | 107         |
| pig#5              | 85      | 100         | 107         | 119         | 136         |
|                    | 71      | 105         | 104         | 138         | 134         |
|                    | 76      | 97          | 131         | 158         | 110         |
|                    | 51      | 104         | 110         | 148         | 139         |
|                    | 62      | 80          | 92          | 122         | 140         |
| 1.4 mm2            | 47.9    | 84.4        | 96.9        | 121.3       | 115.2       |
| SD                 | 34.2    | 60.3        | 69.2        | 86.6        | 82.3        |
| P                  | 5.7     | 5.9         | 4.9         | 5.8         | 5.0         |
|                    |         | 0.0002      | 0.0001      | 0.0001      | 0.0001      |

1H-10:1H20 0.1100  
 3H10:3H20 0.4400  
 1H10:3H10 0.0002  
 1H20:3H20 0.0200  
 1H:3H 0.0001

| C       | 1h-10      |       | 1h-20      |       | 3h-10      |       | 3h-20 |       | whole cell |            |
|---------|------------|-------|------------|-------|------------|-------|-------|-------|------------|------------|
| ki-67   | whole cell | ki-67 | whole cell | ki-67 | whole cell | ki-67 | whole | ki-67 | whole cell | whole cell |
| 67      | 187        | 134   | 261        | 277   | 521        | 273   | 300   | 297   | 362        |            |
| 92      | 243        | 123   | 192        | 193   | 260        | 462   | 552   | 198   | 255        |            |
| 66      | 185        | 141   | 245        | 214   | 343        | 260   | 310   | 165   | 228        |            |
| 92      | 244        | 196   | 302        | 139   | 280        | 287   | 346   | 211   | 255        |            |
| 84      | 241        | 145   | 217        | 151   | 271        | 221   | 259   | 219   | 252        |            |
| C       | 35.8       | 51.3  | 53.2       | 91.0  | 82.0       |       |       |       |            |            |
|         | 37.9       | 64.1  | 74.2       | 83.7  | 77.6       |       |       |       |            |            |
|         | 35.7       | 57.6  | 62.4       | 83.9  | 72.4       |       |       |       |            |            |
|         | 37.7       | 64.9  | 49.6       | 82.9  | 82.7       |       |       |       |            |            |
|         | 34.9       | 66.8  | 55.7       | 85.3  | 86.9       |       |       |       |            |            |
| AVERAGE | 36.4       | 60.9  | 59.0       | 85.4  | 80.3       |       |       |       |            |            |
|         | 0.59       | 2.86  | 4.33       | 1.46  | 2.45       |       |       |       |            |            |

| PIG#4     | contorl | 1hr-10times | 1hr-20times | 3hr-10times | 3hr-20times |
|-----------|---------|-------------|-------------|-------------|-------------|
| in 1.4mm2 | 37      | 80.2        | 88          | 114.2       | 98.4        |
|           | 26.4    | 57.2        | 62.8        | 81.5        | 70.2        |
| Ki-67     | C       | 1h-10       | 1h-20       | 3h-10       | 3h-20       |
|           | 34.2    | 60.3        | 69.2        | 86.6        | 82.3        |

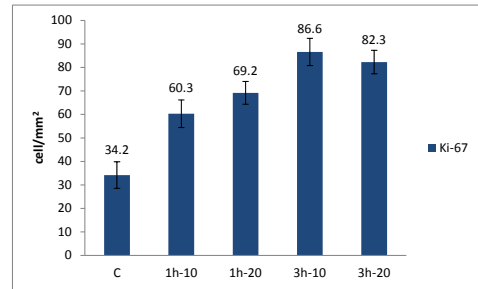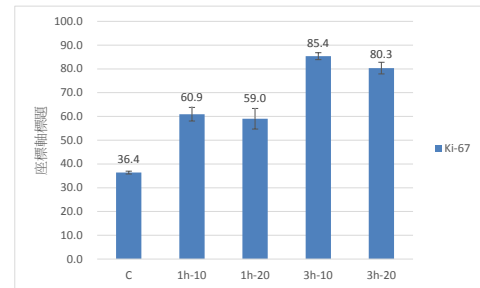

|               | control    | 1hr-10 times | 1hr-20times | 3hr 10 times | 3hr-20 times |  |
|---------------|------------|--------------|-------------|--------------|--------------|--|
| pig3          | 2.8        | 6.7          | 7.5         | 8.7          | 9.2          |  |
| pig4          | 3.57       | 5            | 7.14        | 9.14         | 9.57         |  |
|               | C          | 1hr-10       | 1hr-20      | 3hr 10       | 3hr-20       |  |
| PIG#3         | 4          | 6            | 4           | 10           | 12           |  |
|               | 5          | 8            | 15          | 12           | 12           |  |
|               | 2          | 10           | 10          | 15           | 13           |  |
|               | 3          | 9            | 12          | 12           | 13           |  |
|               | 6          | 14           | 12          | 12           | 15           |  |
| PIG#4         | 6          | 5            | 5           | 6            | 14           |  |
|               | 5          | 11           | 6           | 16           | 10           |  |
|               | 3          | 9            | 12          | 13           | 17           |  |
|               | 4          | 6            | 16          | 13           | 12           |  |
|               | 7          | 4            | 11          | 16           | 14           |  |
| PIG#5         | 11         | 13           | 9           | 9            | 14           |  |
|               | 7          | 11           | 14          | 10           | 14           |  |
|               | 11         | 8            | 11          | 12           | 12           |  |
|               | 7          | 9            | 13          | 11           | 10           |  |
|               | 7          | 8            | 6           | 10           | 15           |  |
| MEAN          | 5.9        | 8.7          | 10.4        | 11.8         | 13.1         |  |
| SE            | 0.44       | 0.59         | 0.78        | 0.55         | 0.33         |  |
| Density       | C          | 1hr-10       | 1hr-20      | 3hr-10       | 3hr-20       |  |
|               | 4.2        | 6.2          | 7.4         | 8.4          | 9.4          |  |
| Blood Vessels |            |              |             |              |              |  |
| P value       |            | 0.007        | 0.0006      | 0.0001       | 0.0001       |  |
|               | 1H-10:1H20 |              | 0.17        |              |              |  |
|               | 3H10:3H20  |              | 0.16        |              |              |  |
|               | 1H10:3H10  |              | 0.05        |              |              |  |
|               | 1H20:3H20  |              | 0.05        |              |              |  |
|               | 1H-3H      |              | 0.01        |              |              |  |

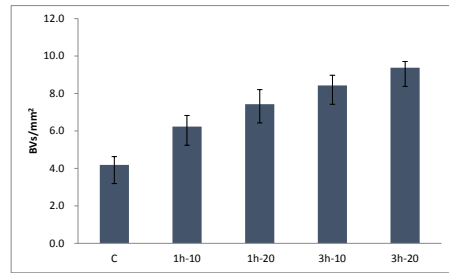

| PIG   | contorl | 1hr-10time | 1hr-20time | 3hr-10time | 3hr-20times      |
|-------|---------|------------|------------|------------|------------------|
|       | 2       | 6          | 6          | 10         | 8                |
|       | 2       | 4          | 7          | 10         | 10               |
|       | 4       | 3          | 6          | 11         | 8                |
|       | 2       | 2          | 4          | 11         | 7                |
|       | 1       | 3          | 4          | 12         | 6                |
| total | 11      | 18         | 27         | 54         | 39               |
| mean  | 2.2     | 3.6        | 5.4        | 10.8       | 7.8 (HF/7.2 MM2) |
|       | 3.05    | 5          | 7.5        | 15         | 10.8 (HF/CM2)    |
| SD    | 1.09    | 1.51       | 1.34       | 0.83       | 1.48             |

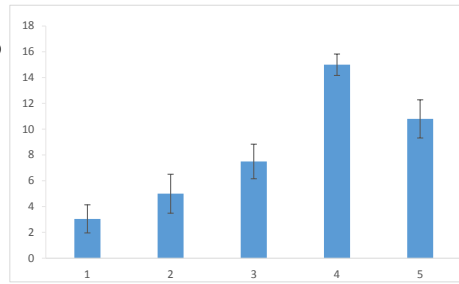

HSD[.05]=2.43; HSD[.01]=3.04  
M1 vs M2 nonsignificant  
M1 vs M3 P<.01  
M1 vs M4 P<.01  
M1 vs M5 P<.01  
M2 vs M3 nonsignificant  
M2 vs M4 P<.01  
M2 vs M5 P<.01  
M3 vs M4 P<.01  
M3 vs M5 nonsignificant  
M4 vs M5 P<.05
